# Supplementary material for: Human and livestock faecal biomarkers at the prehistorical encampment site of Ullafelsen in the Fotsch Valley, Stubai Alps, Austria – potential and limitations
Source: Copernicus journal article supplement (doi:10.5194/bg-19-1135-2022), 2022-02-23
Supplement: Supplementary file 1 [file bg-19-1135-2022-supplement.zip]

Archive with 3 entries (3 files):
- bg-19-1135-2022-supplement-title-page.pdf
- Supplement-Part-2-Table-S3-S4.xlsx
- Supplement-Part-1-Table-S1-S2.xlsx
