# Supplementary material for: Human and livestock faecal biomarkers at the prehistorical encampment site of Ullafelsen in the Fotsch Valley, Stubai Alps, Austria – potential and limitations
Source: Copernicus journal article supplement (doi:10.5194/bg-19-1135-2022), 2022-02-23
Supplement: Supplementary file 1 [file bg-19-1135-2022-supplement.zip › bg-19-1135-2022-supplement-title-page.pdf]

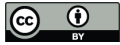

*Supplement of*

**Human and livestock faecal biomarkers at the prehistorical encampment site of Ullafelsen in the Fotsch Valley, Stubai Alps, Austria – potential and limitations**

**Marcel Lerch et al.**

*Correspondence to:* Marcel Lerch ([marcel.lerch@tu-dresden.de](mailto:marcel.lerch@tu-dresden.de))

- [bg-19-1135-2022-supplement-title-page.pdf](#)
- [Supplement-Part-1-Table-S1-S2.xlsx](#)
- [Supplement-Part-2-Table-S3-S4.xlsx](#)

The copyright of individual parts of the supplement might differ from the article licence.
