# Supplementary material for: Human and livestock faecal biomarkers at the prehistorical encampment site of Ullafelsen in the Fotsch Valley, Stubai Alps, Austria – potential and limitations
Source: Copernicus journal article supplement (doi:10.5194/bg-19-1135-2022), 2022-02-23
Supplement: Supplementary file 1 [file bg-19-1135-2022-supplement.zip › Supplement-Part-1-Table-S1-S2.xlsx]

## Sheet: Table S1 + S2
Supplement Part 1 Human and livestock faecal biomarkers at the prehistorical encampment site of Ullafelsen in the Fotsch Valley, Stubai Alps, Austria - potential and limitations by M. Lerch, T. Bromm, C. Geitner, J. N. Haas, D. Schäfer, B. Glaser and M. Zech Biogeosciences Journal
Table S1: Overview of all faecal biomarker soil samples from the prehistorical encampment site of Ullafelsen and reference sites in the Fotsch Valley, Stubai Alps, Austria. Sterol, stanol and stanone content (in micrograms per gram of dry matter) as well as ratios are presented.
	Soil profile & horizon	Altitude	Coordinates	TOC	Coprostanol	Epicoprostanol	Cholestanone	Cholesterol	5α-Cholestanol	Coprostanone	5β-Stigmastanol	Epi-5β-Stigmastanol	Stigmasterol	β-Sitosterol	5α-Stigmastanol	Total sterol, stanol and stanone content		(Coprostanol + Epicoprostanol) / (Coprostanol + Epicoprostanol + 5α-Cholestanol)	(Coprostanol + Epicoprostanol) / (5β-Stigmastanol + Epi-5β-Stigmastanol)	(β-Sitosterol) / (β-Sitosterol + 5β-Stigmastanol + Epi-5β-Stigmastanol)	(5β-Stigmastanol) / (Epi-5β-Stigmastanol)
		[m a.s.l.]		[%]	[μg g-1]	[μg g-1]	[μg g-1]	[μg g-1]	[μg g-1]	[μg g-1]	[μg g-1]	[μg g-1]	[μg g-1]	[μg g-1]	[μg g-1]	[μg g-1]		[Ratio 1]	[Ratio 2]	[Ratio 3]	[Ratio 5]
Sterols, stanols and stanones [Ullafelsen]	1.1 C4w OAh1	1869	N 47.14702° E 11.21475°	15.0644	0.119584	0	0.226323	4.03944	0.811256	0.108282	0	0.72141	19.7828	139.166	10.5856	175.561		0.128469	0.165765	0.994843	0
	1.1 C4w OAh2			8.50917	0.0887503	0	0	0.875503	0.366016	0.0999737	0.281675	0.299303	4.44905	39.6356	7.32148	53.4174		0.195156	0.15276	0.985554	0.941102
	1.1 C4w OAh3			4.26831	0.0442257	0	0.102098	0.28836	0.0944321	0.0448419	0.0787649	0.119581	0.94615	9.0118	1.42849	12.1587		0.318956	0.222972	0.978464	0.658673
	1.1 C4w E (LL)			3.20547	0.0415662	0	0	0.439266	0.178899	0.054452	0.0515579	0.0905182	1.22915	9.40287	1.27134	12.7596		0.188539	0.292563	0.985115	0.569586
	1.1 C4w Bh			8.31284	0.0287094	0	0.0657396	0.40031	0.132896	0.0371963	0	0.0743483	1.44098	10.4387	1.52394	14.1429		0.177651	0.386147	0.992928	0
	1.1 C4w Bs			1.5684	0	0	0	0.18729	0.0420013	0	0.0196877	0.0408421	0.414887	2.14069	0.166884	3.01228		0	0	0.972502	0.482045
	1.1 C4w BvCv			0.806904	0	0	0.0096736	0.184147	0.0336452	0.0209664	0	0	0.385744	1.67509	0.0583462	2.36762		0	n. a.	1	n. a.
	1.1 B5w OAh1)	1869	N 47.14703° E 11.21474°	18.1792	0.224282	0	0	6.17674	1.37533	0	3.34875	3.2384	27.9219	143.089	12.7505	198.125		0.140211	0.0340484	0.955991	1.03407
	1.1 B5w E (LL)			4.51671	0.0342561	0	0	0.665124	0.264793	0.0987387	0.120381	0.162809	2.1197	33.0444	8.33525	44.8455		0.11455	0.120965	0.991503	0.739397
	1.1 B5w Bh			6.07017	0	0	0	0.462714	0.0984656	0.0387851	0	0	1.34285	8.12863	0.856326	10.9278		0	n. a.	1	n. a.
	1.1 B5w Bs			2.27323	0	0	0	0.499539	0.0531295	0.03397	0.017283	0.0340999	0.689665	3.54933	0.344933	5.22195		0	0	0.98573	0.506833
	1.1 B5w BvCv			0.677668	0	0	0	0.246809	0.0266845	0	0	0.0210562	0.250666	2.19964	0.100633	2.84549		0	0	0.990518	0
	1.1 B5s OAh1)	1869	N 47.14704° E 11.21474°	10.3319	0.111627	0	0	1.51681	0.40148	0.0816141	0.391136	0.42559	5.30735	43.0959	3.88893	55.2204		0.217551	0.136676	0.981401	0.919046
	1.1 B5s E (LL)			3.32336	0.044695	0	0	0.592563	0.215312	0.0629717	0.0897715	0.138305	1.83122	14.3677	2.26117	19.6037		0.1719	0.195965	0.984374	0.649083
	1.1 B5s Bh			6.36862	0.0310402	0	0	1.12325	0.309553	0.0342228	0	0.104605	1.46552	16.7198	2.53933	22.3273		0.0911355	0.296738	0.993783	0
	1.1 B5s Bs			2.17581	0.0124619	0	0	0.42609	0.0514631	0.0286664	0.0242446	0.0392808	0.621748	2.97294	0.367658	4.54456		0.194945	0.196171	0.979079	0.617211
	1.1 B5s BvCv			0.301749	0	0	0	0.711396	0.0610331	0	0.0241521	0	1.22633	4.52496	0.083687	6.63156		0	0	0.994691	n. a.
	1.1 G5n OAh1	1869	N 47.14704° E 11.21482°	14.1589	0.123637	0	0	2.77729	0.948429	0.245916	1.29622	1.87743	10.3605	63.154	12.6018	93.3852		0.115326	0.0389572	0.952152	0.690419
	1.1 G5n OAh2			8.36935	0.0598341	0	0	0.82159	0.377232	0.0924095	0.407598	0.731961	3.29313	29.8642	6.78158	42.4296		0.136899	0.0525064	0.963244	0.556858
	1.1 G5n OAh3			25.0362	0.0960977	0	0	1.9157	0.689852	0.515284	1.02643	1.32791	9.90066	150.059	32.0521	197.583		0.12227	0.0408172	0.984553	0.772966
	1.1 G5n E (LL)			3.30739	0.0348196	0	0	0.647114	0.224484	0.0742386	0.185199	0.257933	1.17048	12.4972	4.60943	19.7009		0.134281	0.0785761	0.965756	0.71801
	1.1 G5n Bh			7.12517	0.0250231	0	0	0.604576	0.218497	0.0424175	0.143938	0.169708	1.33003	11.7077	2.28209	16.524		0.102756	0.0797813	0.973909	0.848151
	1.9 NW OAh1	1867	N 47.14698° E 11.21492°	19.2699	0.128775	0	0	5.23014	1.27701	0.319458	1.18078	2.13744	16.3045	72.93	11.1211	110.629		0.0916034	0.0388084	0.956481	0.552427
	1.9 NW OAh2			12.4935	0.154357	0	0	2.89816	1.08396	0.358522	1.31219	2.12311	8.27344	61.9365	14.9192	93.0594		0.12465	0.0449328	0.94745	0.618051
	1.9 NW OAh3			28.8059	0.0946221	0	0	0.705672	0.189125	0.378386	0.510729	0	6.38273	113.076	27.4806	148.818		0.333474	0.185269	0.995504	n. a.
	1.9 NW E (LL)			2.47906	0	0	0	0.360071	0.126085	0.0401669	0	0.0685468	0.529058	2.45332	0.728736	4.30598		0	0	0.972819	0
	1.9 NW Bh			4.7865	0.0208664	0	0	0.53329	0.147867	0.0258089	0	0.0555527	0.713733	3.52641	0.688844	5.71238		0.123665	0.375614	0.984491	0
	1.9 NW Bs			2.48931	0	0	0	0.240897	0.0636553	0.0140992	0	0.0377194	0.331052	1.14716	0.243299	2.07788		0	0	0.968166	0
	1.9 NW BvCv			1.57804	0	0	0	0.229192	0.0397376	0.00927038	0	0	0.153844	0.611285	0.109	1.15233		0	n. a.	1	n. a.
	1.9 NE OAh1	1867	N 47.14699° E 11.21494°	13.5868	0.0774382	0	0	1.84835	0.478151	0.0723028	0.842502	1.21067	13.7022	62.4455	7.06124	87.7384		0.13938	0.0377164	0.968167	0.695898
	1.9 NE OAh2			11.9426	0	0	0	0	0	0.0467805	0.144706	0.14861	0.848973	13.0958	3.34691	17.6318		n. a.	0	0.978093	0.973729
	1.9 NE E 1 (LL)			4.30881	0.0833995	0	0	1.56133	0.670697	0.132268	0.675299	1.19504	5.75541	39.3047	9.20619	58.5843		0.110595	0.0445905	0.954576	0.565083
	1.9 NE Bh			5.45528	0	0	0	0.654521	0.175644	0.0362664	0	0.0867344	1.12484	6.53291	1.56828	10.1792		0	0	0.986897	0
	1.9 NE Bs			3.59873	0	0	0	0.834052	0.212797	0	0	0.0703622	1.42979	6.45858	1.27356	10.2791		0	0	0.989223	0
	1.9 NE E 2 (LL)			1.34669	0	0	0	0.916624	0.131444	0	0	0.0372865	0.646996	3.09383	0.630561	5.45674		0	0	0.988092	0
	1.9 NE BvCv			2.08275	0	0	0	0.34859	0.0644157	0.00248537	0	0	0.314341	0.985202	0.190374	1.90541		0	n. a.	1	n. a.
	1.9 SW E (LL)	1867	N 47.14698° E 11.21493°	1.28507	0	0	0	0.472162	0.083816	0.00375964	0	0	0.358365	1.12356	0.257576	2.29924		0	n. a.	1	n. a.
Sterols, stanols and stanones [Reference]	4.4 OAh	2171	N 47.15060° E 11.20075°	21.8843	0.37445	0.0711888	0.291522	4.20719	0.823387	0.131884	1.58535	1.21317	35.8012	54.4541	7.33552	106.289		0.351166	0.159241	0.95112	1.30678
	4.4 Bh			6.04974	0.00953462	0	0	0.164334	0.0702294	0.0369828	0.0229226	0.0377736	0.78723	2.14318	0.399403	3.67159		0.119535	0.157088	0.972459	0.606841
	4.11 OAh	2548	N 47.14373° E 11.17502°	11.93	0.0572412	0.0227531	0.0895048	1.33102	0.416358	0.11253	0.201905	0.222611	15.3996	16.2402	2.13822	36.2319		0.161164	0.188436	0.974526	0.906983
	4.11 Bh			12.9471	0.013395	0	0.0238334	0.480989	0.20942	0.049664	0.0324436	0.0456774	1.34382	3.37578	0.666005	6.24102		0.0601172	0.171465	0.977382	0.710279
	4.12 OAh	2455	N 47.14584° E 11.18304°	6.57279	0.132551	0.030726	0.127579	1.07986	0.403828	0.0842471	0.526842	0.376885	8.74484	10.626	2.15011	24.2835		0.287913	0.180671	0.921617	1.39788
	4.12 Bh			7.92624	0.00990292	0.0102958	0.0186624	0.431762	0.164729	0.0358006	0.0215026	0.0319481	1.36375	3.52806	1.21942	6.83583		0.109225	0.377895	0.985076	0.673048
	5.5 OAh	2186	N 47.15025° E 11.19981°	16.0315	0.280222	0.158154	0.272014	2.36733	0.462848	0.120015	1.23579	1.02589	13.8777	32.942	2.94182	55.6838		0.486423	0.193828	0.935754	1.2046
	5.5Bh			4.88991	0.007471	0.00903181	0	0.204615	0.0917947	0.0290466	0.0216397	0.0348952	0.69327	1.87961	0.366029	3.3374		0.152384	0.291905	0.9708	0.620133
	5.6w OAh	2186	N 47.14583° E 11.20402°	29.4301	0.445796	0.34948	0.105086	2.76101	0.924612	0.0884698	2.30818	2.9003	23.332	56.0322	6.20172	95.4489		0.4624	0.152689	0.914951	0.795842
	Laboratory standard soil I		Etzdorf		0.0408407	0.0354716	0.015099	0.297361	0.053859	0.0218042	0.0668956	0.0507104	0.863715	2.2453	0.18237	3.87342		0.586245	0.648881	0.950228	1.31917
	Laboratory standard soil II		Etzdorf		0.0343008	0.0202153	0.0187523	0.287001	0.0347914	0.0140908	0.0694795	0.0388197	0.415597	0.716373	0.133362	1.78278		0.610432	0.503384	0.868676	1.7898
1) These soil horizons were assigned to OAh1, due to the similar TOC content to the other OAh1 horizons of the soil profiles.
Table S2: Overview of all faecal biomarker soil samples from the prehistorical encampment site of Ullafelsen and reference sites in the Fotsch Valley, Stubai Alps, Austria. Bile acid content (in micrograms per gram of dry matter) as well as ratios are presented.
	Soil profile & horizon	Altitude	Coordinates	TOC	Isolithocholic acid	Lithocholic acid	Betadeoxycholic acid	Deoxycholic acid	Chenodeoxycholic acid	Hyodeoxycholic acid	Ursodeoxycholic acid	Oxolithocholic acid	Total bile acid content			Deoxycholic acid [DCA] / Lithocholic acid [LCA]
		[m a.s.l.]		[%]	[μg g-1]	[μg g-1]	[μg g-1]	[μg g-1]	[μg g-1]	[μg g-1]	[μg g-1]	[μg g-1]	[μg g-1]			[Ratio 4]
Bile acids [Ullafelsen]	1.1 C4w OAh1	1869	N 47.14702° E 11.21475°	15.0644	0	0.092797	0	2.13298	0.100047	0	0	0.881813	3.20764			22.9855
	1.1 C4w OAh2			8.50917	0	0.181509	0	1.53112	0.174155	0	0	0.759259	2.64605			8.43553
	1.1 C4w OAh3			4.26831	0	0.0295526	0	0.322693	0.0297314	0	0	0.119929	0.501906			10.9193
	1.1 C4w E (LL)			3.20547	0	0.0241022	0	0.233584	0.0296025	0	0	0.0731809	0.360469			9.69138
	1.1 C4w Bh			8.31284	0	0	0	0.145701	0.0262719	0	0	0.0362626	0.208235			n. a.
	1.1 C4w Bs			1.5684	0	0	0	0.0386012	0	0	0	0.0078829	0.0464841			n. a.
	1.1 C4w BvCv			0.806904	0	0	0	0.0083086	0	0	0	0	0.0083086			n. a.
	1.1 B5w OAh2)	1869	N 47.14703° E 11.21474°	18.1792	0	0.185246	0.0828575	3.10782	0.152195	0	0	1.58941	5.11753			16.7767
	1.1 B5w E (LL)			4.51671	0	0.073572	0	0.537087	0.0882547	0	0	0.231252	0.930166			7.30015
	1.1 B5w Bh			6.07017	0	0	0	0.0503041	0.0290493	0	0	0.0286236	0.107977			n. a.
	1.1 B5w Bs			2.27323	0	0	0.0197818	0.0446991	0.0209887	0	0	0.0292032	0.114673			n. a.
	1.1 B5w BvCv			0.677668	0	0	0.0204752	0.0316992	0	0	0	0.027812	0.0799864			n. a.
	1.1 B5s OAh2)	1869	N 47.14704° E 11.21474°	10.3319	0	0.340418	0.0303186	3.61156	0.255577	0	0.172761	1.24649	5.65712			10.6092
	1.1 B5s E (LL)			3.32336	0	0.0226234	0	0.281354	0.030233	0	0	0.109208	0.443419			12.4364
	1.1 B5s Bh			6.36862	0	0	0	0.176999	0.0492781	0	0	0.0662285	0.292506			n. a.
	1.1 B5s Bs			2.17581	0	0	0	0.0682188	0	0	0	0.0336776	0.101896			n. a.
	1.1 B5s BvCv			0.301749	0	0	0	0	0	0	0	0	0			n. a.
	1.1 G5n OAh1	1869	N 47.14704° E 11.21482°	14.1589	0	0.342233	0.0526652	4.12692	0.367832	0	0	1.67929	6.56894			12.0588
	1.1 G5n OAh2			8.36935	0.0462725	0.237293	0.0620068	2.36031	0.256203	0	0	0.850681	3.81276			9.9468
	1.1 G5n OAh3			25.0362	0.0570523	0.420102	0.143474	2.37855	0.418326	0	0	1.10926	4.52676			5.66183
	1.1 G5n E (LL)			3.30739	0	0.0305649	0	0.170758	0.040666	0	0	0.0897404	0.331729			5.58674
	1.1 G5n Bh			7.12517	0	0.0245532	0.0343087	0.192114	0.0430277	0	0	0.0616814	0.355685			7.8244
	1.9 NW OAh1	1867	N 47.14698° E 11.21492°	19.2699	0	0.228247	0.187798	1.72303	0.220078	0	0	1.44034	3.79949			7.54896
	1.9 NW OAh2			12.4935	0	0.508123	0	4.16699	0.562107	0	0	1.56528	6.8025			8.20074
	1.9 NW OAh3			28.8059	0	0.307743	0.175912	1.73498	0.315919	0	0	0.712744	3.2473			5.63775
	1.9 NW E (LL)			2.47906	0	0.0236251	0	0.138947	0.0348236	0	0.348135	0.0670061	0.612537			5.88135
	1.9 NW Bh			4.7865	0	0	0	0.0810343	0.0303661	0	0	0.0304835	0.141884			n. a.
	1.9 NW Bs			2.48931	0	0	0	0.0431341	0.02117	0	0	0.0151115	0.0794156			n. a.
	1.9 NW BvCv			1.57804	0	0	0	0.029128	0	0	0	0.0129969	0.0421249			n. a.
	1.9 NE OAh1	1867	N 47.14699° E 11.21494°	13.5868	0	0.17761	0.0596293	4.1694	0.257665	0	0	1.52438	6.18869			23.475
	1.9 NE OAh2			11.9426	0.0385875	0.329083	0.0521686	2.25183	0.403853	0	0	1.18571	4.26123			6.84273
	1.9 NE E 1 (LL)			4.30881	0	0.0610839	0	0.250313	0.0669879	0	0	0.109738	0.488123			4.09785
	1.9 NE Bh			5.45528	0	0	0	0.114018	0.0373223	0	0	0.0386804	0.19002			n. a.
	1.9 NE Bs			3.59873	0	0	0	0.0581609	0	0	0	0.0195857	0.0777466			n. a.
	1.9 NE E 2 (LL)			1.34669	0	0	0	0.031991	0	0	0	0	0.031991			n. a.
	1.9 NE BvCv			2.08275	0	0	0	0.0284804	0	0	0	0	0.0284804			n. a.
	1.9 SW E (LL)	1867	N 47.14698° E 11.21493°	1.28507	0	0	0	0.0541721	0.0399379	0	0	0.0248658	0.118976			n. a.
Bile acids [Reference]	4.4 OAh	2171	N 47.15060° E 11.20075°	21.8843	0.0169333	0.269523	0.0550882	3.98197	0.548461	0.0325941	0.0148497	1.50251	6.42193			14.7742
	4.4 Bh			6.04974	0.00106045	0.00392277	0.00114608	0.0193452	0.0143687	0.000368259	0.000780883	0.0120056	0.0529979			4.93151
	4.11 OAh	2548	N 47.14373° E 11.17502°	11.93	0.00629115	0.0291782	0.0185182	0.825327	0.091251	0.00393669	0.00355276	0.319815	1.29787			28.2857
	4.11 Bh			12.9471	0.0031299	0.00433806	0.00876303	0.0523629	0.0286943	0	0.00161233	0.0276018	0.126502			12.0706
	4.12 OAh	2455	N 47.14584° E 11.18304°	6.57279	0.00660321	0.065641	0.0212064	0.795974	0.137498	0.00635223	0.00410321	0.256599	1.29398			12.1262
	4.12 Bh			7.92624	0.00541886	0.00766239	0.00905294	0.0863916	0.0296897	0.00178866	0.00262979	0.0307213	0.173355			11.2748
	5.5 OAh	2186	N 47.15025° E 11.19981°	16.0315	0.0142041	0.865292	0.0197672	7.29011	1.25309	0.0136444	0.0251574	2.88191	12.3632			8.42503
	5.5Bh			4.88991	0.00192406	0.00762409	0.00219082	0.0952498	0.0223892	0.00226632	0	0.0481257	0.17977			12.4933
	5.6w OAh	2186	N 47.14583° E 11.20402°	29.4301	0.0274946	0.440836	0.0643676	10.009	0.552217	0.0186935	0	4.34016	15.4528			22.7046
	Laboratory standard soil I		Etzdorf		0.0142707	0.117579	0.011869	0.721595	0.0729178	1.79939	0.0181421	0.115372	2.87113			6.13712
	Laboratory standard soil II		Etzdorf		0.016472	0.119892	0.014071	0.570068	0.0641831	1.59739	0.0104605	0.108904	2.50144			4.75485
2) These soil horizons were assigned to OAh1, due to the similar TOC content to the other OAh1 horizons of the soil profiles.
