# Supplementary material for: Human and livestock faecal biomarkers at the prehistorical encampment site of Ullafelsen in the Fotsch Valley, Stubai Alps, Austria – potential and limitations
Source: Copernicus journal article supplement (doi:10.5194/bg-19-1135-2022), 2022-02-23
Supplement: Supplementary file 1 [file bg-19-1135-2022-supplement.zip › Supplement-Part-2-Table-S3-S4.xlsx]

## Sheet: Table S3 + S4
Supplement Part 2 Human and livestock faecal biomarkers at the prehistorical encampment site of Ullafelsen in the Fotsch Valley, Stubai Alps, Austria - potential and limitations by M. Lerch, T. Bromm, C. Geitner, J. N. Haas, D. Schäfer, B. Glaser and M. Zech Biogeosciences Journal
			Table S3: Sterol, stanol and stanone content (in micrograms per gram of dry matter) for three replication measurements of modern cattle and sheep faeces from the prehistorical encampment site of Ullafelsen and reference sites in the Fotsch Valley, Stubai Alps, Austria.
			Sterols, stanols, stanones [μg g-1 dry matter] and ratios
			Recovery	Coprostanol	Epicoprostanol	Cholestanone	Cholesterol	5α-Cholestanol	Coprostanone	5β-Stigmastanol	Epi-5β-Stigmastanol	Stigmasterol	β-Sitosterol	5α-Stigmastanol	TSSSC*	(Coprostanol+Epicoprostanol) / (Coprostanol+Epicoprostanol+5α-Cholestanol)	(Coprostanol+Epicoprostanol) / (5β-Stigmastanol+Epi-5β-Stigmastanol)	β-Sitosterol / (β-Sitosterol+5β-Stigmastanol+Epi-5β-Stigmastanol)
Cattle	Measurement 1	Heck cattle1	0.993459	125.673	15.4038	28.7375	116.828	36.9812	8.52927	930.858	251.421	67.4026	347.907	471.852	2401.59	0.792309	0.119326	0.227362
	Measurement 2	Heck cattle2	0.922625	124.56	11.8887	18.5437	141.3	37.3184	5.0417	881.138	254.606	91.3158	471.778	634.13	2671.62	0.785239	0.12014	0.293481
	Measurement 3	Heck cattle3	0.904348	126.651	11.4714	16.3654	138.676	40.0181	5.03661	917.123	259.236	76.8189	398.94	554.788	2545.13	0.775356	0.117415	0.253247
			Sterols, stanols, stanones [μg g-1 dry matter] and ratios
			Recovery	Coprostanol	Epicoprostanol	Cholestanone	Cholesterol	5α-Cholestanol	Coprostanone	5β-Stigmastanol	Epi-5β-Stigmastanol	Stigmasterol	β-Sitosterol	5α-Stigmastanol	TSSSC*	(Coprostanol+Epicoprostanol) / (Coprostanol+Epicoprostanol+5α-Cholestanol)	(Coprostanol+Epicoprostanol) / (5β-Stigmastanol+Epi-5β-Stigmastanol)	β-Sitosterol / (β-Sitosterol+5β-Stigmastanol+Epi-5β-Stigmastanol)
Sheep	Measurement 1	Sheep1	1.03619	173.436	46.1456	87.0067	173.481	39.9572	17.6805	437.168	666.53	39.8031	255.932	484.732	2421.87	0.846045	0.198951	0.188237
	Measurement 2	Sheep2	0.513711	121.861	15.8048	29.6741	50.8863	0.952199	6.97385	455.688	765.062	48.3239	280.964	607.671	2383.86	0.993131	0.112772	0.187096
	Measurement 3	Sheep3	0.471015	139.463	33.7446	26.2995	151.93	29.9559	6.24172	367.478	625.053	39.417	211.031	479.197	2109.81	0.852553	0.174511	0.175339
			Table S4: Bile acid content (in micrograms per gram of dry matter) for three replication measurements of modern cattle and sheep faeces from the prehistorical encampment site of Ullafelsen and reference sites in the Fotsch Valley, Stubai Alps, Austria.
			Bile acids [μg g-1 dry matter] and ratios
			Recovery	Isolithocholic acid	Lithocholic acid	Betadeoxycholic acid	Deoxycholic acid	Chenodeoxycholic acid	Hyodeoxycholic acid	Ursodeoxycholic acid	Oxolithocholic acid	TBAC**	Deoxycholic acid [DCA] / Lithocholic acid [LCA]
Cattle	Measurement 1	Heck cattle1	0.811724	2.81484	4.19147	3.3489	38.6614	2.5981	0	0	4.30782	55.9225	9.22382
	Measurement 2	Heck cattle2	0.530466	4.02889	7.29259	7.33199	25.5246	6.32731	0	0	36.299	86.8043	3.50007
	Measurement 3	Heck cattle3	0.904084	2.46869	4.28548	4.60579	31.8327	3.84027	0	0	37.3488	84.3817	7.42804
			Bile acids [μg g-1 dry matter] and ratios
			Recovery	Isolithocholic acid	Lithocholic acid	Betadeoxycholic acid	Deoxycholic acid	Chenodeoxycholic acid	Hyodeoxycholic acid	Ursodeoxycholic acid	Oxolithocholic acid	TBAC**	Deoxycholic acid [DCA] / Lithocholic acid [LCA]
Sheep	Measurement 1	Sheep1	0.864295	2.53745	2.91654	8.54573	54.9508	2.43715	0	0	7.22787	78.6156	18.8411
	Measurement 2	Sheep2	0.939375	2.29527	3.30171	9.22665	27.925	3.84973	0	0	118.202	164.801	8.45775
	Measurement 3	Sheep3	0.943081	2.25072	3.21585	9.81667	29.328	3.91181	0	0	168.35	216.873	9.11985
			* TSSSC	Total sterol, stanol and stanone content
			** TBAC	Total bile acid content
